# Supplementary material for: Integration of CuInS2-based nanocrystals for high efficiency and high colour rendering white light-emitting diodes
Source: Royal Society of Chemistry journal article supplement (doi:10.1039/c3nr33613a), 2013-01-01
Supplement: c3nr33613a.pdf [file c3nr33613a.pdf]

## Supporting information

# **Integration of CuInS<sub>2</sub> Based Nanocrystals for High Efficiency and High Colour Rendering White Light-Emitting Diodes**

Bingkun Chen, Haizheng Zhong, Meixu Wang, Ruibin Liu, and Bingsuo Zou

Beijing Key Laboratory of Nanophotonics and Ultrafine Optoelectronic Systems,  
School of Materials Science & Engineering, Beijing Institute of Technology, Beijing,  
100081, China.

Email: hzzhong@bit.edu.cn

**Table S1.** The elemental analysis from EDS determinations. CIS 1 is the Cu-In-Zn-S cores. CIS 2-7 are the samples that produced with adding various amount Zinc precursors.

| Sample | Emission peak | EDS results |      |      |            |
|--------|---------------|-------------|------|------|------------|
|        |               | Cu          | In   | Zn   | Zn/(Cu+In) |
| CIS1   | 565 nm        | 1           | 8.9  | 1.4  | 0.14       |
| CIS2   | 547 nm        | ---         | ---  | ---  | ---        |
| CIS3   | 540 nm        | ---         | ---  | ---  | ---        |
| CIS4   | 538 nm        | 1           | 3.6  | 17.0 | 3.67       |
| CIS5   | 535 nm        | ---         | ---  | ---  | ---        |
| CIS6   | 530 nm        | 1           | 6.5  | 24.3 | 3.25       |
| CIS7   | 525 nm        | 1           | 10.4 | 42.0 | 3.68       |

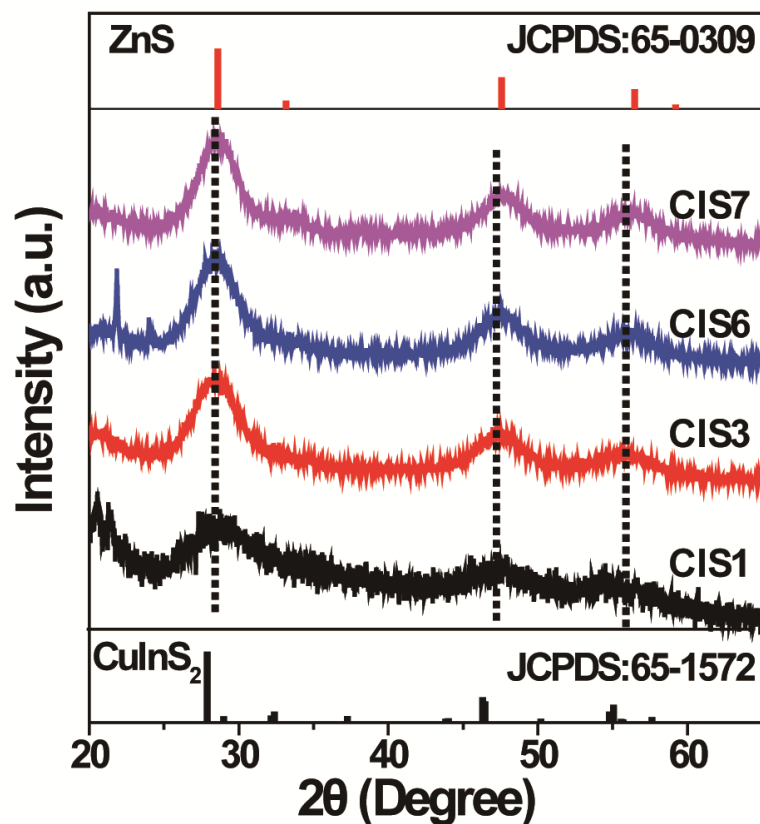

**Figure S1.** XRD patterns of resulting NCs (CIS 1, CIS 3, CIS 6).

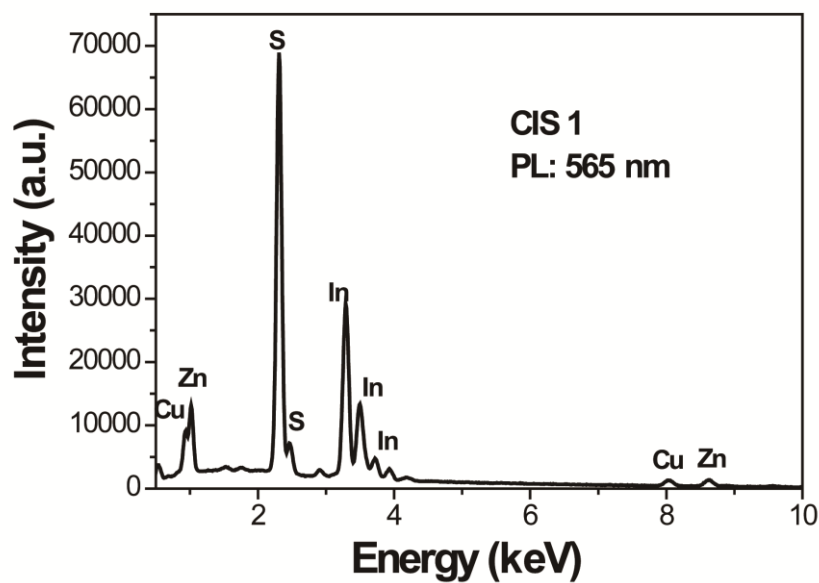

**Figure S2.** A typical EDS spectrum of resulting  $\text{CuInS}_2$  based NCs.

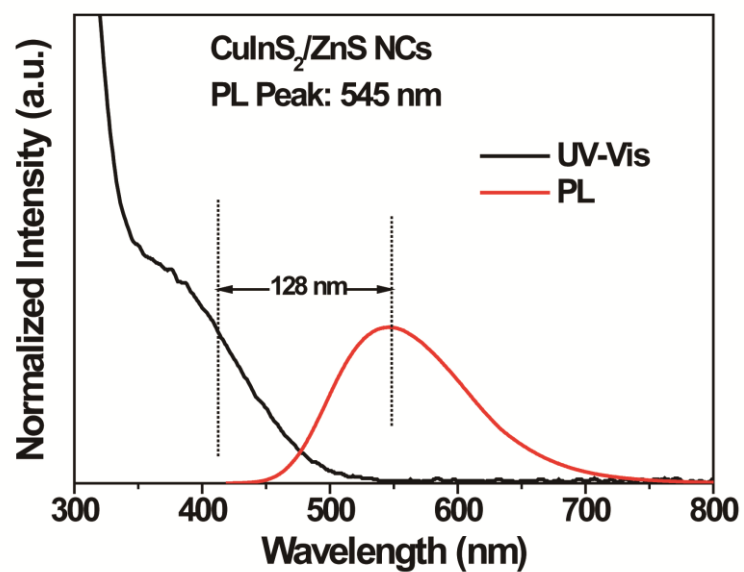

**Figure S3.** The absorption and PL spectra of typical  $\text{CuInS}_2$  based NCs in toluene.

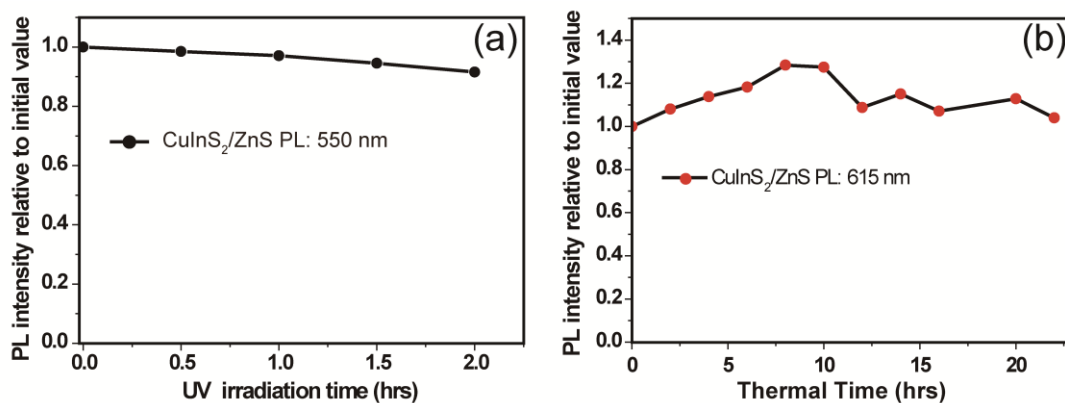

**Figure S4.** The evolution of PL intensity of CuInS<sub>2</sub> based NCs (a) under UV 365 nm radiation and (b) thermal treatment at 150 °C under air for 20 h.

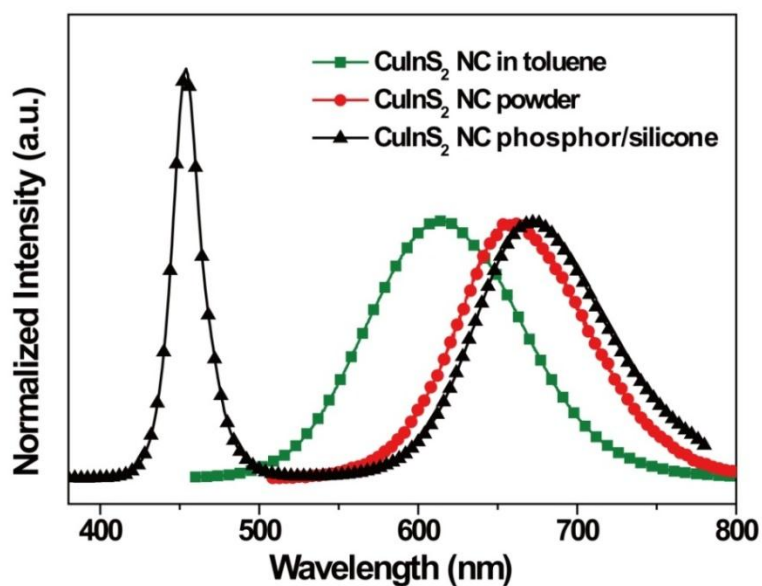

**Figure S5.** Normalized PL spectra of CuInS<sub>2</sub> based NC in toluene (green square line), CuInS<sub>2</sub> based NC powder (red circle line) under laser excitation of 405 nm and EL spectra of the LED devices based on composites of silicone and CuInS<sub>2</sub> based NC phosphors with emission peak at 615 nm.
